# Supplementary material for: Enzymatic characterization of three human RNA adenosine methyltransferases reveals diverse substrate affinities and reaction optima
Source: PubMed Central journal article supplement (PMC7948815; doi:10.1016/j.jbc.2021.100270), 2021-01-09
Supplement: mmc1.pdf [file mmc1.pdf]

## Supporting Information

### **Enzymatic characterization of three human RNA adenosine methyltransferases reveals diverse substrate affinities and reaction optima**

Dan Yu<sup>1</sup>, Gundeep Kaur<sup>1</sup>, Robert M. Blumenthal<sup>2</sup>, Xing Zhang<sup>1,\*</sup>, Xiaodong Cheng<sup>1,\*</sup>

<sup>1</sup>Department of Epigenetics and Molecular Carcinogenesis, University of Texas MD Anderson Cancer Center, Houston, TX 77030, USA

<sup>2</sup>Department of Medical Microbiology and Immunology, and Program in Bioinformatics, The University of Toledo College of Medicine and Life Sciences, Toledo, OH 43614, USA

\* Correspondence: XZhang21@mdanderson.org or XCheng5@mdanderson.org

Email addresses:

DY (DYu6@mdanderson.org); GK (GKaur1@mdanderson.org);

RMB (Robert.Blumenthal@utoledo.edu); XZ (XZhang21@mdanderson.org);

XC (XCheng5@mdanderson.org)

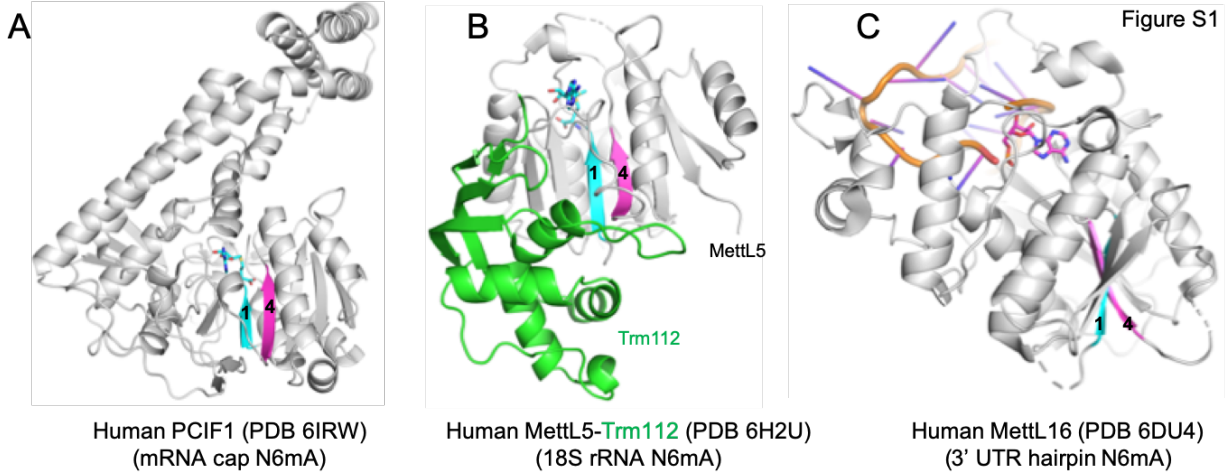

D Group  $\alpha$  or  $\gamma$  MTases = NH<sub>2</sub> ····  $\beta$ 1-2-3 ······  $\beta$ 4-5-6-7 ···· COOH

|             | $\beta$ 1 | Motif I                              | $\beta$ 4 | Motif IV                      | substrate/product |
|-------------|-----------|--------------------------------------|-----------|-------------------------------|-------------------|
| E. Coli Dam | 31        | LVEP <b>FV</b> GAGSVFLNT 45.....175  |           | SSVVYCD <b>PPY</b> APLSAT 190 | DNA N6mA          |
| MettL5      | 53        | KVVAD <b>LGG</b> CGVLSI 67.....120   |           | FDTVIM <b>PPF</b> GTKNNK 135  | rRNA N6mA         |
| MettL16     | 104       | RRGID <b>IGT</b> GASCIYP 118.....178 |           | YDFCMC <b>PPF</b> FANQLE 193  | snRNA N6mA        |
| HemK2       | 47        | EICLE <b>VGG</b> SGVWSA 61.....116   |           | VDLLV <b>FNP</b> PYVVTPPQ 131 | protein Q/K(me1)  |
| PCIF1/CAPAM | 513       | TFEC <b>FAS</b> PLNCYFKQ 527.....547 |           | SGSFEAN <b>PPF</b> CEELMD 562 | mRNA cap N6mA(m)  |

| Mammal                                     | PCIF1        | Motif I                                      | Motif IV                                          |
|--------------------------------------------|--------------|----------------------------------------------|---------------------------------------------------|
| Platypus – <i>Ornithorhynchus anatinus</i> | XP_028904763 | HRLFVGSFECF <b>FAS</b> PLNCYFRQYCSA          | <b>F</b> SPLSGSFEAN <b>PPF</b> CEELMDAMVS         |
| Opossum – <i>Monodelphis domestica</i>     | XP_007474986 | HRLFVGSFECF <b>FAS</b> PLNCYFRQYCSA          | <b>F</b> YPLSGSFEAN <b>PPF</b> CEELMDAMVS         |
| Elephant – <i>Loxodonta africana</i>       | XP_023406075 | HRLFVGSFECF <b>FAS</b> PLNCYFRQYCSA          | <b>F</b> SPLSGSFEAN <b>PPF</b> CEELMD <b>T</b> VS |
| Armadillo – <i>Dasybus novemcinctus</i>    | XP_012385012 | HRLF <b>S</b> VSFECF <b>FAS</b> PLNCYFRQYCSA | <b>F</b> SPLSGSFEAN <b>PPF</b> CEELMDAMVS         |
| Human – <i>Homo sapiens</i>                | NP_071387    | HRLFVGSFECF <b>FAS</b> PLNCYFRQYCSA          | <b>F</b> APLSGSFEAN <b>PPF</b> CEELMDAMVS         |
| Mouse – <i>Mus musculus</i>                | NP_001361055 | HRLFVGSFECF <b>FAS</b> PLNCYFRQYCSA          | <b>F</b> TPLSGSFEAN <b>PPF</b> CEELMDAMVS         |
| Mole – <i>Condylura cristata</i>           | XP_004687490 | HRLFVGSFECF <b>FAS</b> PLNCYFRQYCSA          | <b>F</b> SPLSGSFEAN <b>PPF</b> CEELMDAMVS         |
| Bat – <i>Pteropus vampyrus</i>             | XP_011367609 | HRLFVGSFECF <b>FAS</b> PLNCYFRQYCSA          | <b>F</b> SPLSGSFEAN <b>PPF</b> CEELMDAMVS         |
| Goat – <i>Capra aegagrus / C. hircus</i>   | XP_017913438 | HRLFVGSFECF <b>FAS</b> PLNCYFRQYCSA          | <b>F</b> SPLSGSFEAN <b>PPF</b> CEELMDAMVS         |
| Horse – <i>Equus caballus</i>              | XP_023482399 | HRLFVGSFECF <b>FAS</b> PLNCYFRQYCSA          | <b>F</b> SPLSGSFEAN <b>PPF</b> CEELMDAMVS         |
| Pangolin – <i>Manis pentadactyla</i>       | XP_036758026 | HRLF <b>S</b> VSFECF <b>FAS</b> PLNCYFRQYCSA | <b>F</b> SPLSGSFEAN <b>PPF</b> CEELMDAMVS         |
| Wolf – <i>Canis lupus</i>                  | XP_005635184 | HRLF <b>S</b> VSFECF <b>FAS</b> PLNCYFRQYCSA | <b>F</b> SPLSGSFEAN <b>PPF</b> CEELMDAMVS         |

  

| Mammal                                     | MettL5       | Motif I                           | Motif IV                                          |
|--------------------------------------------|--------------|-----------------------------------|---------------------------------------------------|
| Platypus – <i>Ornithorhynchus anatinus</i> | XP_028927764 | YDDIED <b>KVVADLGG</b> CGVLSIGSAM | MSKSFDTVIM <b>PPF</b> GTKHNKGMDM                  |
| Opossum – <i>Monodelphis domestica</i>     | XP_001375717 | YDDIENK <b>VIGDLGG</b> CGMLSIGAA  | <b>I</b> SKSFDT <b>I</b> IM <b>PPF</b> GTKHNKGMDM |
| Elephant – <i>Loxodonta africana</i>       | XP_010601144 | YDDIENK <b>VVADLGG</b> CGVLSIGTAM | MSKSFDTVIM <b>PPF</b> GTKNNKGTDM                  |
| Armadillo – <i>Dasybus novemcinctus</i>    | XP_004460848 | YDDIENK <b>VVADLGG</b> CGVLSIGTAM | MSKSFDTVIM <b>PPF</b> GTKNNK <b>I</b> DI          |
| Human – <i>Homo sapiens</i>                | NP_001280115 | YDDIENK <b>VVADLGG</b> CGVLSIGTAM | MSKSFDTVIM <b>PPF</b> GTKNNKGTDM                  |
| Mouse – <i>Mus musculus</i>                | NP_083556    | YDDIENK <b>VVADLGG</b> CGVLSIGAA  | MSK <b>L</b> FDTVIM <b>PPF</b> GTKNNKGTDM         |
| Mole – <i>Condylura cristata</i>           | XP_004674616 | YDDIENK <b>VADLGG</b> CGVLSIGTAM  | <b>I</b> SKSFDTVIM <b>PPF</b> GTKNNKGTDM          |
| Bat – <i>Pteropus vampyrus</i>             | XP_023385363 | YDDIENK <b>VADLGG</b> CGVLSIGTAM  | MSKSFDTVIM <b>PPF</b> GTKNNKGTDM                  |
| Goat – <i>Capra aegagrus / C. hircus</i>   | XP_005676044 | YDDIENK <b>VVADLGG</b> CGVLSIGTAM | <b>I</b> SKSFDTVIM <b>PPF</b> GTKNNKGTDM          |
| Horse – <i>Equus caballus</i>              | XP_001498013 | YDDIENK <b>VVADLGG</b> CGVLSIGTAM | MSKSFDTVIM <b>PPF</b> GTKNNKGTDM                  |
| Pangolin – <i>Manis pentadactyla</i>       | XP_036743976 | YDDIENK <b>VVADLGG</b> CGVLSIGTAM | MSKSFDTVIM <b>PPF</b> GTKN <b>K</b> GTDM          |
| Wolf – <i>Canis lupus</i>                  | XP_005640349 | YDDIENK <b>VVADLGG</b> CGVLSIGTAM | MSKSFDTVIM <b>PPF</b> GTKNNKGTDM                  |

  

| Mammal                                     | MettL16      | Motif I                                              | Motif IV                                  |
|--------------------------------------------|--------------|------------------------------------------------------|-------------------------------------------|
| Platypus – <i>Ornithorhynchus anatinus</i> | XP_028938135 | <b>S</b> LKNTLRRGID <b>IGT</b> GASCIYPLLGA           | SEI IYDFCMC <b>PPF</b> FANQLEAKGV         |
| Opossum – <i>Monodelphis domestica</i>     | XP_016284792 | <b>P</b> ARSALRRGID <b>IGT</b> GASCIYPLLGA           | SEI IYDFCMC <b>PPF</b> FANQLEAKGV         |
| Elephant – <i>Loxodonta africana</i>       | XP_003417034 | <b>S</b> DRSTLRRGID <b>IGT</b> GASCIYPLLGA           | SEI IYDFCMC <b>PPF</b> FANQLEAKGV         |
| Human – <i>Homo sapiens</i>                | NP_076991    | SDKSTLRRGID <b>IGT</b> GASCIYPLLGA                   | SEI IYDFCMC <b>PPF</b> FANQLEAKGV         |
| Mouse – <i>Mus musculus</i>                | NP_080473    | SDK <b>T</b> TLRRGID <b>IGT</b> GASCIYPLLGA          | SEI IYDFCMC <b>PPF</b> FANQLEAKGV         |
| Mole – <i>Condylura cristata</i>           | XP_004684839 | SDKSTLRRGID <b>IGT</b> GASCIYPLL <b>G</b> T          | SEI IYDFCMC <b>PPF</b> FANQLEAKGV         |
| Bat – <i>Pteropus vampyrus</i>             | XP_011358139 | SDK <b>T</b> TLRRGID <b>IGT</b> GASCIYPLL <b>G</b> S | SEI <b>V</b> YDFCMC <b>PPF</b> FANQLEAKGV |
| Goat – <i>Capra aegagrus / C. hircus</i>   | XP_005693382 | SDKSTLRRGID <b>IGT</b> GASCIYPLL <b>G</b> T          | SEI IYDFCMC <b>PPF</b> FANQLEAKGV         |
| Horse – <i>Equus caballus</i>              | XP_014583405 | SDKSTLRRGID <b>IGT</b> GASCIYPLL <b>G</b> T          | SEI IYDFCMC <b>PPF</b> FANQLEAKGV         |
| Pangolin – <i>Manis pentadactyla</i>       | XP_036762024 | SDKSTLRRGID <b>IGT</b> GASCIYPLL <b>G</b> T          | SEI IYDFCMC <b>PPF</b> FANQLEAKGV         |
| Wolf – <i>Canis lupus</i>                  | XP_022279183 | SDKSTLRRGID <b>IGT</b> GASCIYPLL <b>G</b> T          | SEI IYDFCMC <b>PPF</b> FANQLEAKGV         |

Figure S1. The seven-stranded class-I methyltransferase domain in (A) PCIF1 (PDB 6IRW), (B) MettL5-Trm112 (PDB 6H2U), and (C) MettL16 (6DU4), showing the standard central

topological switch-point, seen in this family of MTases, between strands  $\beta 1$  (cyan) and  $\beta 4$  (magenta). **(D)** The relative sequence positions, of conserved motif I (located in the carboxy end of strand  $\beta 1$ ) and motif IV (located in carboxy end of strand  $\beta 4$ ), are similar to those of *E. coli* DNA adenine methyltransferase (Dam) and human HemK2, a protein glutamine and lysine MTase. The common feature of the respective substrates is the amino group ( $\text{NH}_2$ ) of DNA/RNA adenine or protein glutamine or lysine (in the deprotonated state), at which all three methylation reactions are catalyzed by a NPPF/Y version of motif IV. **(E)** Structure-guided alignment shows that PCIF1 has a somewhat unusual version of motif I (SAM binding, in this case lacking the typical GxG element) that is highly conserved among mammals. The MettL5 and MettL16 motifs I (DxGxG) and IV are well conserved across the Mammalia. Not shown is *D. novemcinctus* (armadillo) MettL16 homolog (XP\_023441943), which may start from the wrong (downstream) ATG; the rest of the putative amino-terminal sequence is not available. Variations from the human sequence are highlighted by cyan background.

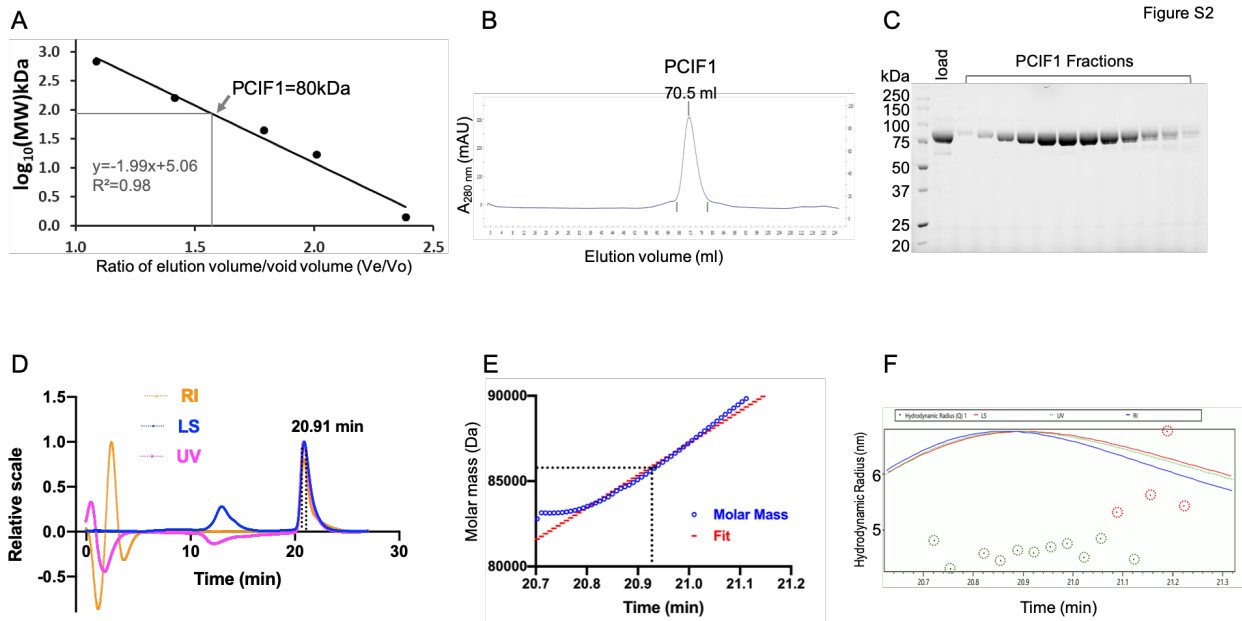

**Figure S2.** Purified recombinant PCIF1 used in this study. **(A)** A calibration curve for a Superdex 200 16/60 column based on five standards. The estimated apparent molecular weight of PCIF1 is 80 kDa. **(B)** Elution profile of PCIF1 and **(C)** peak fractions (shown in 12% SDS PAGE) from gel filtration column (Superdex S200 16/60). **(D)** SEC-MALS profile of PCIF1. Elution profile from the Shodex KW803 column. Peak at 20.91 min corresponding to PCIF1. **(E)** The observed molecular weight of PCIF1 is 86 kDa (Y-axis) at 20.91 min (X-axis). **(F)** Plot of hydrodynamic radius in circles (Y-axis) versus time of elution (X-axis). The observed hydrodynamic radius is  $4.8 \pm 0.4$  nm.

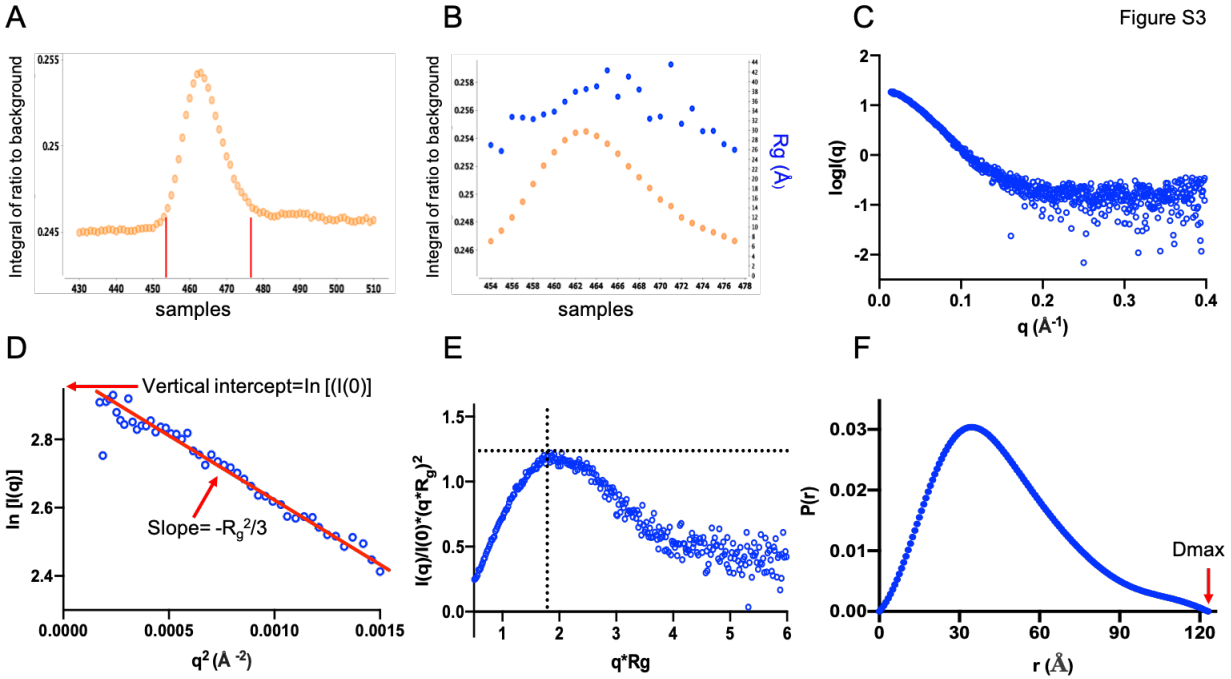

**Figure S3.** SEC-SAXS analysis of PCIF1. **(A)** In line SEC trace showing PCIF1 elutes as a single peak with no apparent signs of aggregation. **(B)** The blue dots show corresponding values of radius of gyration ( $R_g$ ) across the elution peak. **(C)** Experimental scattering curve plotted as  $\log I(q)$  versus  $q$  in units of inverse angstroms after background-subtracted from the buffer scattering ( $q=4\pi\sin\theta/\lambda$  where  $2\theta$  is defined as the scattering angle and  $\lambda$  is the wavelength in  $\text{\AA}$  of the incoming X-ray beam). **(D)** Guinier plot as a linear fit between  $\ln(I)$  versus  $q^2$ . The  $R_g$  value ( $\sim 36 \text{ \AA}$ ) is derived from the slope ( $= -R_g^2/3$ ). The zero-angle scattering intensity  $I(0)$  value (20.81) is derived from the vertical intercept. **(E)** Dimensionless Kratky plot is presented as  $(qR_g)^2 I(q)/I(0)$  versus  $qR_g$ . The bell-shaped peak at low  $q$  suggests that PCIF1 is well-folded and globular in solution. The Porod volume is  $\sim 125,875 \text{ \AA}^3$  and molecular weight is  $\sim 86 \text{ kDa}$ . **(F)** Normalized pair distance distribution function  $P(r)$ , generated from the Fourier transform of  $I(q)$ , represents a continuous electron-pair distances ( $r$ ) in the protein. The maximum dimension of the protein  $D_{\text{max}}$  is estimated to be  $121 \text{ \AA}$ .

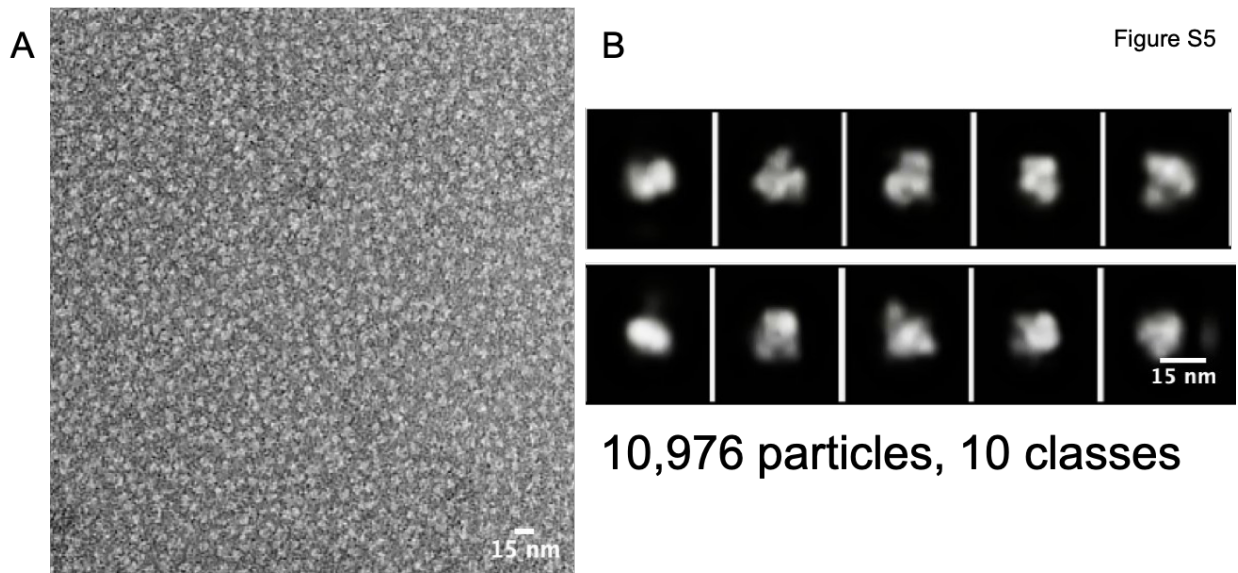

**Figure S4.** EM analysis of full length PCIF1. **(A)** A representative electron micrograph of PCIF1 negatively stained with 2% uranyl acetate and recorded at 40,000x. The scale bar is 15 nm. **(B)** Ten different 2D class averages generated from 10,976 particles.
